# Supplementary material for: Exposure to a Vitamin D Best Practices Toolkit, Model, and E-Tools Increases Knowledge, Confidence, and the Translation of Research to Public Health and Practice
Source: MDPI journal article supplement (doi:10.3390/nu15112446), 2023-05-24
Supplement: s1 [file s1]

**Table S1:** Vitamin D Resources for Healthcare Professionals

| Peer-Reviewed Journal Articles  |                                                                                                                                                                                                                                                                                                                                                                                                                                                                                                                                                                                                                                                                                                                                                                                                                                                                                                                                                                                                                                                                                                                                                                                                                                                                                                                                                                                                             |
|---------------------------------|-------------------------------------------------------------------------------------------------------------------------------------------------------------------------------------------------------------------------------------------------------------------------------------------------------------------------------------------------------------------------------------------------------------------------------------------------------------------------------------------------------------------------------------------------------------------------------------------------------------------------------------------------------------------------------------------------------------------------------------------------------------------------------------------------------------------------------------------------------------------------------------------------------------------------------------------------------------------------------------------------------------------------------------------------------------------------------------------------------------------------------------------------------------------------------------------------------------------------------------------------------------------------------------------------------------------------------------------------------------------------------------------------------------|
| Call to Public Health Action    | <p>Baggerly, C. A., Cuomo, R. E., French, C. B., Garland, C. F., Gorham, E. D., Grant, W. B., Heaney, R. P., Holick, M. F., Hollis, B. W., McDonnell, S. L., Pittaway, M., Seaton, P., Wagner, C. L., &amp; Wunsch, A. (2015). Sunlight and vitamin D: Necessary for public health. <i>Journal of the American College of Nutrition</i>, 34(4), 359–365. <a href="https://doi.org/10.1080/07315724.2015.1039866">https://doi.org/10.1080/07315724.2015.1039866</a></p> <p>Grant, W.B., Al Anouti, F. &amp; Moukayed, M. (2020). Targeted 25-hydroxyvitamin D concentration measurements and vitamin D<sub>3</sub> supplementation can have important patient and public health benefits. <i>Eur J Clin Nutr</i>, 74, 366–376 <a href="https://doi.org/10.1038">https://doi.org/10.1038</a></p> <p>Holick M. F. (2017). The vitamin D deficiency pandemic: Approaches for diagnosis, treatment, and prevention. <i>Reviews in Endocrine &amp; Metabolic Disorders</i>, 18(2), 153–165. <a href="https://doi.org/10.1007/s11154-017-9424-1">https://doi.org/10.1007/s11154-017-9424-1</a></p> <p>Kimball, S. M., &amp; Holick, M. F. (2020). Official recommendations for vitamin D through the Life stages in developed countries. <i>European Journal of Clinical Nutrition</i>, 74(11), 1514–1518. <a href="https://doi.org/10.1038/s41430-020-00706-3">https://doi.org/10.1038/s41430-020-00706-3</a></p> |
| Research Appraisal              | <p>Heaney R. P. (2014). Guidelines for optimizing design and analysis of clinical studies of nutrient effects. <i>Nutrition reviews</i>, 72(1), 48–54. <a href="https://doi.org/10.1111/nure.12090">https://doi.org/10.1111/nure.12090</a></p> <p>Hollis, B. W., &amp; Wagner, C. L. (2013). Clinical review: The role of the parent compound vitamin D with respect to metabolism and function: Why clinical dose intervals can affect clinical outcomes. <i>The Journal of Clinical Endocrinology and Metabolism</i>, 98(12), 4619–4628. <a href="https://doi.org/10.1210/jc.2013-2653">https://doi.org/10.1210/jc.2013-2653</a></p> <p>Pilz, S., Trummer, C., Theiler-Schwetz, V., Grübler, M. R., Verheyen, N. D., Odler, B., Karras, S. N., Zittermann, A., &amp; März, W. (2022). Critical Appraisal of Large Vitamin D Randomized Controlled Trials. <i>Nutrients</i>, 14(2), 303. <a href="https://doi.org/10.3390/nu14020303">https://doi.org/10.3390/nu14020303</a></p> <p>Infographic to aid with research appraisal <a href="https://www.grassrootshealth.net/document/assess-validity-vitamin-d-research-infographic/">https://www.grassrootshealth.net/document/assess-validity-vitamin-d-research-infographic/</a></p>                                                                                                                                                                       |
| Vitamin D Physiology            | <p>Heaney, R. P., &amp; Armas, L. A. (2015). Quantifying the vitamin D economy. <i>Nutrition reviews</i>, 73(1), 51–67. <a href="https://doi.org/10.1093/nutrit/nuu004">https://doi.org/10.1093/nutrit/nuu004</a></p> <p>Holick M. F. (2007). Vitamin D deficiency. <i>The New England Journal of Medicine</i>, 357(3), 266–281. <a href="https://doi.org/10.1056/NEJMra070553">https://doi.org/10.1056/NEJMra070553</a></p>                                                                                                                                                                                                                                                                                                                                                                                                                                                                                                                                                                                                                                                                                                                                                                                                                                                                                                                                                                                |
| Totality of Evidence            | <p>Grant, W. B., Boucher, B. J., Al Anouti, F., &amp; Pilz, S. (2022). Comparing the Evidence from Observational Studies and Randomized Controlled Trials for Nonskeletal Health Effects of Vitamin D. <i>Nutrients</i>, 14(18), 3811. <a href="https://doi.org/10.3390/nu14183811">https://doi.org/10.3390/nu14183811</a></p> <p>Grant, W. B., Al Anouti, F., Boucher, B. J., Fakhoury, H. M. A., Moukayed, M., Pilz, S., &amp; Al-Daghri, N. M. (2023). Evidence That Increasing Serum 25(OH)D Concentrations to 30 ng/mL in the Kingdom of Saudi Arabia and the United Arab Emirates Could Greatly Improve Health Outcomes. <i>Biomedicines</i>, 11(4), 994. MDPI AG. Retrieved from <a href="http://dx.doi.org/10.3390/biomedicines11040994">http://dx.doi.org/10.3390/biomedicines11040994</a></p>                                                                                                                                                                                                                                                                                                                                                                                                                                                                                                                                                                                                     |
| General Vitamin D meta-analyses | <p>Grant, W. B., Al Anouti, F., Boucher, B. J., Dursun, E., Gezen-Ak, D., Jude, E. B., Karonova, T., &amp; Pludowski, P. (2022). A narrative review of the evidence for variations in serum 25-</p>                                                                                                                                                                                                                                                                                                                                                                                                                                                                                                                                                                                                                                                                                                                                                                                                                                                                                                                                                                                                                                                                                                                                                                                                         |

|                           |                                                                                                                                                                                                                                                                                                                                                                                                                                                                                                                                                                                                                                                                                                                                                                                                                                                                                                                                                                                                                                                                                                                                                                                                                                                                                                                                                                                      |
|---------------------------|--------------------------------------------------------------------------------------------------------------------------------------------------------------------------------------------------------------------------------------------------------------------------------------------------------------------------------------------------------------------------------------------------------------------------------------------------------------------------------------------------------------------------------------------------------------------------------------------------------------------------------------------------------------------------------------------------------------------------------------------------------------------------------------------------------------------------------------------------------------------------------------------------------------------------------------------------------------------------------------------------------------------------------------------------------------------------------------------------------------------------------------------------------------------------------------------------------------------------------------------------------------------------------------------------------------------------------------------------------------------------------------|
|                           | Hydroxyvitamin D concentration thresholds for optimal health. <i>Nutrients</i> , 14(3), 639. <a href="https://doi.org/10.3390/nu14030639">https://doi.org/10.3390/nu14030639</a>                                                                                                                                                                                                                                                                                                                                                                                                                                                                                                                                                                                                                                                                                                                                                                                                                                                                                                                                                                                                                                                                                                                                                                                                     |
| Cardiovascular Disease    | Acharya, P., Dalia, T., Ranka, S., Sethi, P., Oni, O. A., Safarova, M. S., Parashara, D., Gupta, K., & Barua, R. S. (2021). The Effects of Vitamin D Supplementation and 25-Hydroxyvitamin D Levels on the Risk of Myocardial Infarction and Mortality. <i>Journal of the Endocrine Society</i> , 5(10), bvab124. <a href="https://doi.org/10.1210/jendso/bvab124">https://doi.org/10.1210/jendso/bvab124</a>                                                                                                                                                                                                                                                                                                                                                                                                                                                                                                                                                                                                                                                                                                                                                                                                                                                                                                                                                                        |
| Type 2 Diabetes           | McDonnell, S. L., Baggerly, L. L., French, C. B., Heaney, R. P., Gorham, E. D., Holick, M. F., Scragg, R., & Garland, C. F. (2016). Incidence rate of type 2 diabetes is >50% lower in GrassrootsHealth cohort with median serum 25-hydroxyvitamin D of 41 ng/ml than in NHANES cohort with median of 22 ng/ml. <i>The Journal of Steroid Biochemistry and Molecular Biology</i> , 155(Pt B), 239–244. <a href="https://doi.org/10.1016/j.jsbmb.2015.06.013">https://doi.org/10.1016/j.jsbmb.2015.06.013</a><br><br>Chatterjee, R., Davenport, C. A., Vickery, E. M., Johnson, K. C., Kashyap, S. R., LeBlanc, E. S., Nelson, J., Dagogo-Jack, S., Pittas, A. G., Hughes, B. D., D2d Research Group, Steering Committee, Past Steering Committee members, & Advisor (2023). Effect of intra-trial mean 25(OH)D level on diabetes risk, by race and weight: an ancillary analysis in the D2d randomized study cohort. <i>The American journal of clinical nutrition</i> , S0002-9165(23)46304-6. Advance online publication. <a href="https://doi.org/10.1016/j.ajcnut.2023.03.021">https://doi.org/10.1016/j.ajcnut.2023.03.021</a>                                                                                                                                                                                                                                                  |
| Cancer                    | Muñoz, A., & Grant, W. B. (2022). Vitamin D and cancer: An historical overview of the epidemiology and mechanisms. <i>Nutrients</i> , 14(7), 1448. <a href="https://doi.org/10.3390/nu14071448">https://doi.org/10.3390/nu14071448</a>                                                                                                                                                                                                                                                                                                                                                                                                                                                                                                                                                                                                                                                                                                                                                                                                                                                                                                                                                                                                                                                                                                                                               |
| Autoimmune Disease        | Mirhosseini, N., Brunel, L., Muscogiuri, G., & Kimball, S. (2017). Physiological serum 25-hydroxyvitamin D concentrations are associated with improved thyroid function-observations from a community-based program. <i>Endocrine</i> , 58(3), 563–573. <a href="https://doi.org/10.1007/s12020-017-1450-y">https://doi.org/10.1007/s12020-017-1450-y</a>                                                                                                                                                                                                                                                                                                                                                                                                                                                                                                                                                                                                                                                                                                                                                                                                                                                                                                                                                                                                                            |
| COVID-19                  | Gibbons, J. B., Norton, E. C., McCullough, J. S., Meltzer, D. O., Lavigne, J., Fiedler, V. C., & Gibbons, R. D. (2022). Association between vitamin D supplementation and COVID-19 infection and mortality. <i>Scientific reports</i> , 12(1), 19397. <a href="https://doi.org/10.1038/s41598-022-24053-4">https://doi.org/10.1038/s41598-022-24053-4</a><br><br>Kaufman, H. W., Niles, J. K., Kroll, M. H., Bi, C., & Holick, M. F. (2020). SARS-CoV-2 positivity rates associated with circulating 25-hydroxyvitamin D levels. <i>PloS one</i> , 15(9), e0239252. <a href="https://doi.org/10.1371/journal.pone.0239252">https://doi.org/10.1371/journal.pone.0239252</a><br><br>Moukayed M. (2023). A Narrative Review on the Potential Role of Vitamin D <sub>3</sub> in the Prevention, Protection, and Disease Mitigation of Acute and Long COVID-19. <i>Current nutrition reports</i> , 10.1007/s13668-023-00471-2. Advance online publication. <a href="https://doi.org/10.1007/s13668-023-00471-2">https://doi.org/10.1007/s13668-023-00471-2</a>                                                                                                                                                                                                                                                                                                                           |
| Pregnancy/Infant Outcomes | Hollis, B. W., Wagner, C. L., Howard, C. R., Ebeling, M., Shary, J. R., Smith, P. G., Taylor, S. N., Morella, K., Lawrence, R. A., & Hulsey, T. C. (2015). Maternal versus infant vitamin D supplementation during lactation: A randomized controlled trial. <i>Pediatrics</i> , 136(4), 625–634. <a href="https://doi.org/10.1542/peds.2015-1669">https://doi.org/10.1542/peds.2015-1669</a><br><br>McDonnell, S. L., Baggerly, K. A., Baggerly, C. A., Aliano, J. L., French, C. B., Baggerly, L. L., Ebeling, M. D., Rittenberg, C. S., Goodier, C. G., Mateus Niño, J. F., Wineland, R. J., Newman, R. B., Hollis, B. W., & Wagner, C. L. (2017). Maternal 25(OH)D concentrations ≥40 ng/mL associated with 60% lower preterm birth risk among general obstetrical patients at an urban medical center. <i>PloS One</i> , 12(7), e0180483. <a href="https://doi.org/10.1371/journal.pone.0180483">https://doi.org/10.1371/journal.pone.0180483</a><br><br>Rostami, M., Tehrani, F. R., Simbar, M., Bidhendi Yarandi, R., Minooe, S., Hollis, B. W., & Hosseini-panah, F. (2018). Effectiveness of Prenatal Vitamin D Deficiency Screening and Treatment Program: A Stratified Randomized Field Trial. <i>The Journal of clinical endocrinology and metabolism</i> , 103(8), 2936–2948. <a href="https://doi.org/10.1210/jc.2018-00109">https://doi.org/10.1210/jc.2018-00109</a> |

|                         |                                                                                                                                                                                                                                                                                                                                                                                                                                                                                                                                                                                                                                                                                                                                                                                                                                                                                                                                                                                                                                                                                                                                                                                          |
|-------------------------|------------------------------------------------------------------------------------------------------------------------------------------------------------------------------------------------------------------------------------------------------------------------------------------------------------------------------------------------------------------------------------------------------------------------------------------------------------------------------------------------------------------------------------------------------------------------------------------------------------------------------------------------------------------------------------------------------------------------------------------------------------------------------------------------------------------------------------------------------------------------------------------------------------------------------------------------------------------------------------------------------------------------------------------------------------------------------------------------------------------------------------------------------------------------------------------|
|                         |                                                                                                                                                                                                                                                                                                                                                                                                                                                                                                                                                                                                                                                                                                                                                                                                                                                                                                                                                                                                                                                                                                                                                                                          |
| Mental/Cognitive Health | <p>Kouba, B. R., Camargo, A., Gil-Mohapel, J., &amp; Rodrigues, A. (2022). Molecular Basis Underlying the Therapeutic Potential of Vitamin D for the Treatment of Depression and Anxiety. <i>International journal of molecular sciences</i>, 23(13), 7077. <a href="https://doi.org/10.3390/ijms23137077">https://doi.org/10.3390/ijms23137077</a></p> <p>Lavigne, J. E., &amp; Gibbons, J. B. (2023). The association between vitamin D serum levels, supplementation, and suicide attempts and intentional self-harm. <i>PloS one</i>, 18(2), e0279166. <a href="https://doi.org/10.1371/journal.pone.0279166">https://doi.org/10.1371/journal.pone.0279166</a></p> <p>Mikola, T., Marx, W., Lane, M. M., Hockey, M., Loughman, A., Rajapolvi, S., Rocks, T., O'Neil, A., Mischoulon, D., Valkonen-Korhonen, M., Lehto, S. M., &amp; Ruusunen, A. (2022). The effect of vitamin D supplementation on depressive symptoms in adults: A systematic review and meta-analysis of randomized controlled trials. <i>Critical reviews in food science and nutrition</i>, 1–18. <a href="https://doi.org/10.1080/10408398.2022.2096560">https://doi.org/10.1080/10408398.2022.2096560</a></p> |
| Musculoskeletal Health  | <p>Grant, W. B., Al Anouti, F., Boucher, B. J., Fakhoury, H. M. A., Moukayed, M., Pilz, S., &amp; Al-Daghri, N. M. (2023). Evidence That Increasing Serum 25(OH)D Concentrations to 30 ng/mL in the Kingdom of Saudi Arabia and the United Arab Emirates Could Greatly Improve Health Outcomes. <i>Biomedicines</i>, 11(4), 994. MDPI AG. Retrieved from <a href="http://dx.doi.org/10.3390/biomedicines11040994">http://dx.doi.org/10.3390/biomedicines11040994</a></p>                                                                                                                                                                                                                                                                                                                                                                                                                                                                                                                                                                                                                                                                                                                 |
| Gastrointestinal Health | <p>Fakhoury, H., Kvietyts, P. R., AlKattan, W., Anouti, F. A., Elahi, M. A., Karras, S. N., &amp; Grant, W. B. (2020). Vitamin D and intestinal homeostasis: Barrier, microbiota, and immune modulation. <i>The Journal of Steroid Biochemistry and Molecular Biology</i>, 200, 105663. <a href="https://doi.org/10.1016/j.jsbmb.2020.105663">https://doi.org/10.1016/j.jsbmb.2020.105663</a></p>                                                                                                                                                                                                                                                                                                                                                                                                                                                                                                                                                                                                                                                                                                                                                                                        |
| Dental Health           | <p>Uwitonze, A. M., Murererehe, J., Ineza, M. C., Harelimana, E. I., Nsabimana, U., Uwambaye, P., Gatarayiha, A., Haq, A., &amp; Razzaque, M. S. (2018). Effects of vitamin D status on oral health. <i>The Journal of steroid biochemistry and molecular biology</i>, 175, 190–194. <a href="https://doi.org/10.1016/j.jsbmb.2017.01.020">https://doi.org/10.1016/j.jsbmb.2017.01.020</a></p> <p>Grant, W. B., &amp; Boucher, B. J. (2010). Are Hill's criteria for causality satisfied for vitamin D and periodontal disease? <i>Dermato-endocrinology</i>, 2(1), 30–36. <a href="https://doi.org/10.4161/derm.2.1.12488">https://doi.org/10.4161/derm.2.1.12488</a></p>                                                                                                                                                                                                                                                                                                                                                                                                                                                                                                               |
| Cost-Effectiveness      | <p>Lacey, L. F., Armstrong, D. J., Royle, E., Magee, P., Pourshahidi, L. K., Ray, S., Strain, J. J., &amp; McSorley, E. (2022). Cost-effectiveness of vitamin D<sub>3</sub> supplementation in older adults with vitamin D deficiency in Ireland. <i>BMJ nutrition, prevention &amp; health</i>, 5(1), 98–105. <a href="https://doi.org/10.1136/bmjnp-2021-000382">https://doi.org/10.1136/bmjnp-2021-000382</a></p> <p>Peiris, A. N., Bailey, B. A., &amp; Manning, T. (2008). The relationship of vitamin D deficiency to health care costs in veterans. <i>Military Medicine</i>, 173(12), 1214–1218. <a href="https://doi.org/10.7205/milmed.173.12.1214">https://doi.org/10.7205/milmed.173.12.1214</a></p>                                                                                                                                                                                                                                                                                                                                                                                                                                                                         |

| Resource Type                                             | Title                                                                                                                                             | Location                                                                                                                                                                                      |
|-----------------------------------------------------------|---------------------------------------------------------------------------------------------------------------------------------------------------|-----------------------------------------------------------------------------------------------------------------------------------------------------------------------------------------------|
| CEU--Vitamin D Healthcare Professional Education e-Course | <i>Moving Vitamin D Research into Practice: Addressing Vitamin D Deficiency to Improve Patient Outcomes, Population Health &amp; Reduce Costs</i> | Announcing a New Vitamin D*Education Course - Great for Everyone, and CEU Approved! - GrassrootsHealth                                                                                        |
| Translational Model                                       | <i>The Cycle of Best Practices for Addressing Vitamin D Deficiency</i>                                                                            | Sanford, B. S. & Aliano, J. L. (2022). Cycle of best practices for addressing vitamin D deficiency. (19) (PDF) Cycle of Best Practices for Addressing Vitamin D Deficiency (researchgate.net) |

|                                           |                                                                                     |                                                                                                                                                                                                                                                                                                                                                                                                                                                           |
|-------------------------------------------|-------------------------------------------------------------------------------------|-----------------------------------------------------------------------------------------------------------------------------------------------------------------------------------------------------------------------------------------------------------------------------------------------------------------------------------------------------------------------------------------------------------------------------------------------------------|
| Translational Resource Guide              | The IRB-approved <i>KNOW “D” NUMBER Patient and Provider Guide</i>                  | <a href="https://www.grassrootshealth.net/document/know-d-number-patient-provider-guide-understanding-vitamin-d-testing-results-booklet/KNOW%20%D%20NUMBER%20Patient%20and%20Provider%20Guide">https://www.grassrootshealth.net/document/know-d-number-patient-provider-guide-understanding-vitamin-d-testing-results-booklet/KNOW “D” NUMBER Patient and Provider Guide to Understanding Vitamin D, Testing &amp; Results Booklet - GrassrootsHealth</a> |
| IRB-approved e-tool (beta)                | <i>Vitamin D Deficiency Risk Assessment Quiz</i>                                    | GrassrootsHealth. (2022). <i>Achieve and manage your optimal vitamin D levels</i> . GrassrootsHealth Nutrient Research Institute. <a href="https://grassrootshealth.org/project/achieve-manage-optimal-vitamin-d-levels/">https://grassrootshealth.org/project/achieve-manage-optimal-vitamin-d-levels/</a>                                                                                                                                               |
| IRB-approved e-tool (2015)                | <i>Vitamin D*Calculator™</i>                                                        | GrassrootsHealth. (2022). <i>Achieve and manage your optimal vitamin D levels</i> . GrassrootsHealth Nutrient Research Institute. <a href="https://grassrootshealth.org/project/achieve-manage-optimal-vitamin-d-levels/">https://grassrootshealth.org/project/achieve-manage-optimal-vitamin-d-levels/</a>                                                                                                                                               |
| Infographics                              | Vitamin D and Nutrients Infographics for HCP or patient education, and social media | <a href="https://www.grassrootshealth.net/blog/new-infographics-documentation-page/NEW!">https://www.grassrootshealth.net/blog/new-infographics-documentation-page/NEW!</a> Infographics Documentation Page - GrassrootsHealth                                                                                                                                                                                                                            |
| Vitamin D and Nutrient Science Newsletter | GrassrootsHealth Newsletter                                                         | GrassrootsHealth : Sign Up to Stay Informed on Vitamin D and Nutrient Research                                                                                                                                                                                                                                                                                                                                                                            |
| Organizations                             | GrassrootsHealth Nutrient Research Institute                                        | Home - GrassrootsHealth                                                                                                                                                                                                                                                                                                                                                                                                                                   |
|                                           | Vitamin D Society of Canada                                                         | The VitaminD Society                                                                                                                                                                                                                                                                                                                                                                                                                                      |
|                                           | SUNARC                                                                              | SUNARC - Sunlight, Nutrition, and Health Research Center   Vitamin D for Better Health                                                                                                                                                                                                                                                                                                                                                                    |
| Websites                                  | Vitamin D Wiki – contains a library of vitamin D research                           | <a href="https://vitamindwiki.com/">https://vitamindwiki.com/</a>                                                                                                                                                                                                                                                                                                                                                                                         |
